# Supplementary material for: Challenges of early renal cancer detection: symptom patterns and incidental diagnosis rate in a multicentre prospective UK cohort of patients presenting with suspected renal cancer
Source: PubMed Central journal article supplement (PMC7223292; doi:10.1136/bmjopen-2019-035938), 2020-05-11
Supplement: bmjopen-2019-035938supp001.pdf [file bmjopen-2019-035938supp001.pdf]

**Supplementary Table 1. Study recruitment by centre**

| Centre ID | Total patients recruited<br>n (% of total) | Recruitment period<br>(months)* | Recruitment rate (pt/mo) |
|-----------|--------------------------------------------|---------------------------------|--------------------------|
| 50        | 255 (36.1)                                 | 35                              | 7.3                      |
| 69        | 103 (14.6)                                 | 19                              | 5.4                      |
| 221       | 75 (10.6)                                  | 28                              | 2.7                      |
| 361       | 72 (10.3)                                  | 23                              | 3.1                      |
| 15        | 62 (8.8)                                   | 21                              | 2.9                      |
| 39        | 44 (6.2)                                   | 25                              | 1.8                      |
| 153       | 33 (4.7)                                   | 15                              | 2.2                      |
| 352       | 27 (3.8)                                   | 25                              | 1.1                      |
| 537       | 13 (1.8)                                   | 12                              | 1.1                      |
| 132       | 13 (1.8)                                   | 15                              | 0.9                      |
| 131       | 9 (1.3)                                    | 11                              | 0.8                      |

First patient registered July 2011; Last patient registered June 2014

\* recruitment times vary based on the fact that centres opened to recruitment at different times
