# Supplementary material for: Challenges of early renal cancer detection: symptom patterns and incidental diagnosis rate in a multicentre prospective UK cohort of patients presenting with suspected renal cancer
Source: PubMed Central journal article supplement (PMC7223292; doi:10.1136/bmjopen-2019-035938), 2020-05-11
Supplement: bmjopen-2019-035938supp002.pdf [file bmjopen-2019-035938supp002.pdf]

**Supplementary Table 2. Comparison of current study patient characteristics with other RCC populations**

| Characteristic             | Current Cohort (n=608) | UK RCC population data | US RCC population data n=104,000 Saad et al. 2019 <sup>d</sup> | Global RCC Study n=4288 (69.2% European cases) Laguna et al. 2014 <sup>e</sup> |
|----------------------------|------------------------|------------------------|----------------------------------------------------------------|--------------------------------------------------------------------------------|
| Age (years) median (range) | 63.5 (29-92)           | 69 <sup>a</sup>        | <65 (52%)<br>>65 (48%)                                         | 62 (18-92)                                                                     |
| Sex (M:F) (%)              | 65:35                  | 63:37 <sup>b</sup>     | 64:36                                                          | 64:36                                                                          |
| pT stage n (%)             |                        |                        |                                                                |                                                                                |
| 1                          | 341 (57)               | -                      | -                                                              | 2954 (68)                                                                      |
| 2                          | 78 (13)                | -                      | -                                                              | 553 (13)                                                                       |
| 3                          | 172 (29)               | -                      | -                                                              | 617 (14)                                                                       |
| 4                          | 4 (1)                  | -                      | -                                                              | 32 (1)                                                                         |
| Missing                    | 1 (0)                  | -                      | -                                                              | 195 (4)                                                                        |
| TNM Stage n (%)            |                        |                        |                                                                |                                                                                |
| I                          | 341 (56)               | 4005 (43) <sup>c</sup> | 68094 (65.1)                                                   | -                                                                              |
| II                         | 70 (12)                | 677 (7)                | (Combined with I)                                              | -                                                                              |
| III                        | 142 (23)               | 1560 (17)              | 16480 (15.8)                                                   | -                                                                              |
| IV                         | 55 (9)                 | 1834 (20)              | 16513 (15.8)                                                   | 299 (7)                                                                        |
| Missing                    | 0 (0)                  | 1222 (13)              | -                                                              | -                                                                              |
| Tumour Type n (%)          |                        |                        |                                                                |                                                                                |
| Clear cell                 | 480 (79)               | -                      | * 46818 (72.0)                                                 | 2424 (75.9)                                                                    |
| Papillary                  | 60 (10)                | -                      | 8730 (13.4)                                                    | 435 (13.6)                                                                     |
| Chromophobe                | 46 (8)                 | -                      | 4127 (6.3)                                                     | 247 (7.8)                                                                      |
| Other RCC                  | 21 (3)                 | -                      | 5354 (8.2)                                                     | 87 (2.7)                                                                       |

<sup>a</sup> Shephard E et al. Clinical features of kidney cancer in primary care: a case-control study using primary care records. *Br J Gen Pract* 2013;**63**:e250-5. n=3149 UK cases

<sup>b</sup> Cancer Research UK. <https://www.cancerresearchuk.org/health-professional/cancer-statistics-for-the-uk>. 2016

<sup>c</sup> [http://ncin.org.uk/publications/survival\\_by\\_stage](http://ncin.org.uk/publications/survival_by_stage). 2017.

<sup>d</sup> Saad et al. Trends in Renal-Cell Carcinoma Incidence and Mortality in the United States in the Last 2 Decades: A SEER-Based Study. *Clin Genitourinary Cancer*. 2019;**17**:46-57

\* amongst 62.2% of cases with known tumour type

<sup>e</sup> Laguna MP, Algaba F, Cadeddu J *et al*. Current patterns of presentation and treatment of renal masses: a clinical research office of the endourological society prospective study. *J Endourol* 2014;**28**:861-70.

Prospective epidemiological, clinical and pathological data on consecutive patients with renal masses treated during a 1-year period in 98 centres worldwide
